# Supplementary material for: Co3O4/activated carbon nanocomposites as electrocatalysts for the oxygen evolution reaction
Source: Royal Society of Chemistry journal article supplement (doi:10.1039/d3dt03720g), 2024-01-01
Supplement: d3dt03720g1.pdf [file d3dt03720g1.pdf]

# Co<sub>3</sub>O<sub>4</sub>/Activated Carbon Nanocomposites as Electrocatalysts for Oxygen Evolution Reaction

Andrei F. V. de Lima,<sup>a</sup> Annaíres de A. Lourenço,<sup>a</sup> Vinícius D. Silva,<sup>b</sup> André L. Menezes de Oliveira,<sup>c</sup> Arpad M. Rostas,<sup>d</sup> Lucian Barbu Tudoran,<sup>d</sup> Cristian Leostean,<sup>d</sup> Ovidiu Pana,<sup>d</sup> Rodolfo B. da Silva,<sup>b</sup> Daniel A. Macedo,<sup>b</sup> Fausthon F. da Silva,<sup>\*a</sup>

---

*a. Departamento de Química, Universidade Federal da Paraíba, 58051-900, João Pessoa-PB, Brazil.*

*b. Programa de Pós-Graduação em Ciência e Engenharia de Materiais – PPECM, Universidade Federal da Paraíba, 58051-900, João Pessoa-PB, Brazil.*

*c. Núcleo de Pesquisa e Extensão LACOM, Departamento de Química, Universidade Federal da Paraíba, 52051-85, João Pessoa-PB, Brazil*

*d. Department of Physics of Nanostructure Systems, National Institute for Research and Development of Isotopic and Molecular Technologies, 400293 Cluj-Napoca, Romania.*

## Electronic Supplementary Information

**Table S1.** Mass of the ZIF-67/C products, mass and yield of ZIF-67 obtained in the synthesis, and percentage (w/w) of ZIF-67 in the composites.

| Samples    | product | Activated carbon | ZIF-67 | Yield of ZIF-67 | %(w/w <sub>total</sub> ) of ZIF-67 in the composite |
|------------|---------|------------------|--------|-----------------|-----------------------------------------------------|
| ZIF-67/C10 | 228 mg  | 117 mg           | 111 mg | 40.4%           | 48.7%                                               |
| ZIF-67/C30 | 480 mg  | 351 mg           | 129 mg | 46.9%           | 26.9%                                               |
| ZIF-67/C50 | 716 mg  | 581 mg           | 135 mg | 49.1%           | 18.9%                                               |
| ZIF-67*    | 135 mg  | --               | --     | 49.1%           | --                                                  |

\*Synthesis without the presence of activated carbon

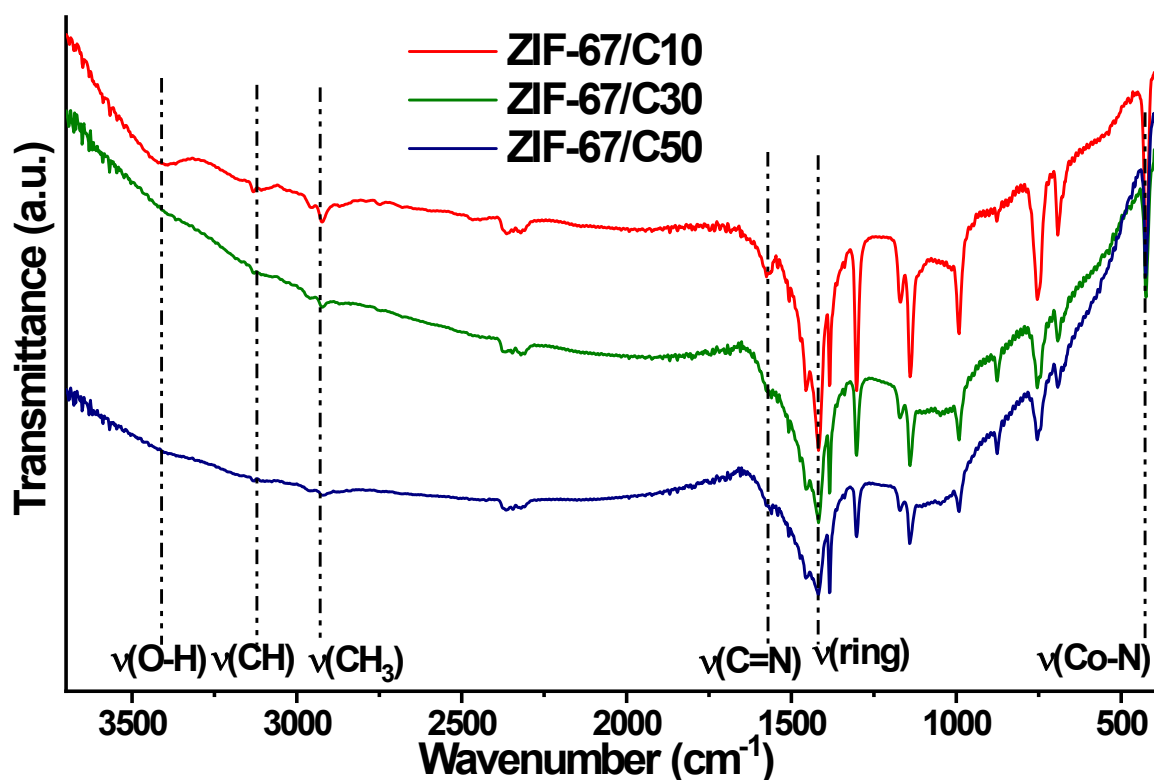

**Figure S1:** FT-IR spectra of the ZIF-67/C composites

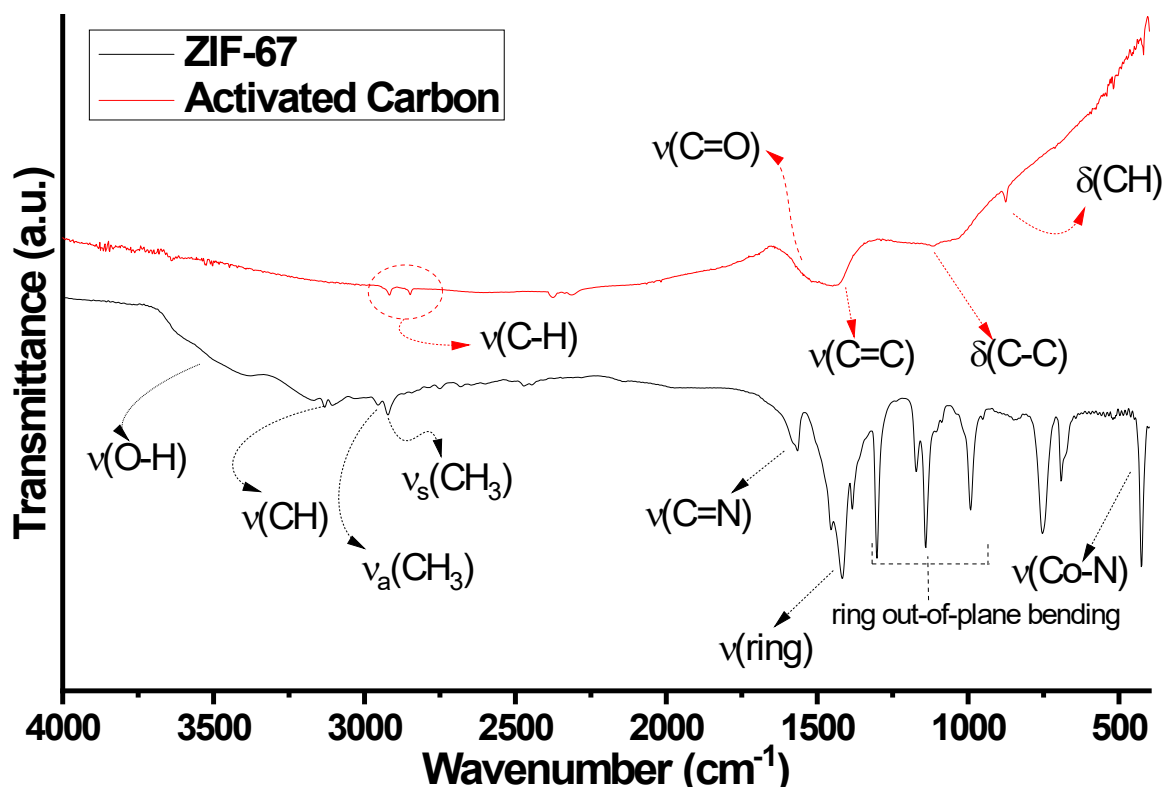

Figure S2: FT-IR spectra of activated carbon and ZIF-67.

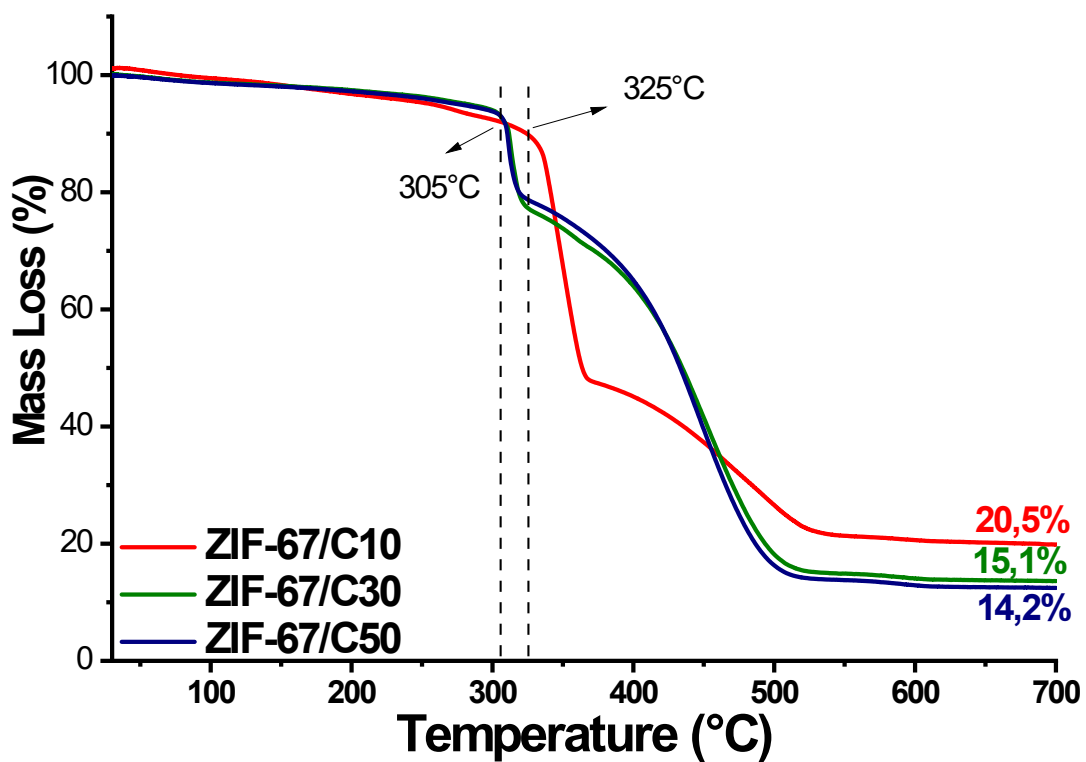

Figure S3: TGA curves of ZIF-67/C composites.

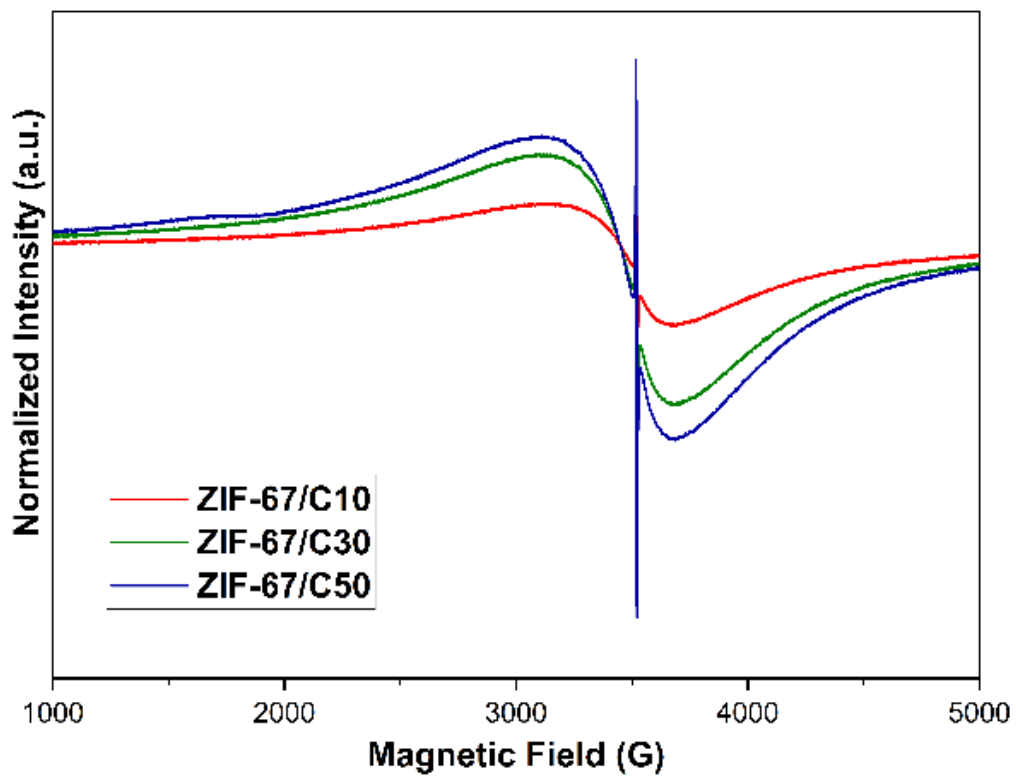

**Figure S4:** EPR spectra of ZIF-67/C composites.

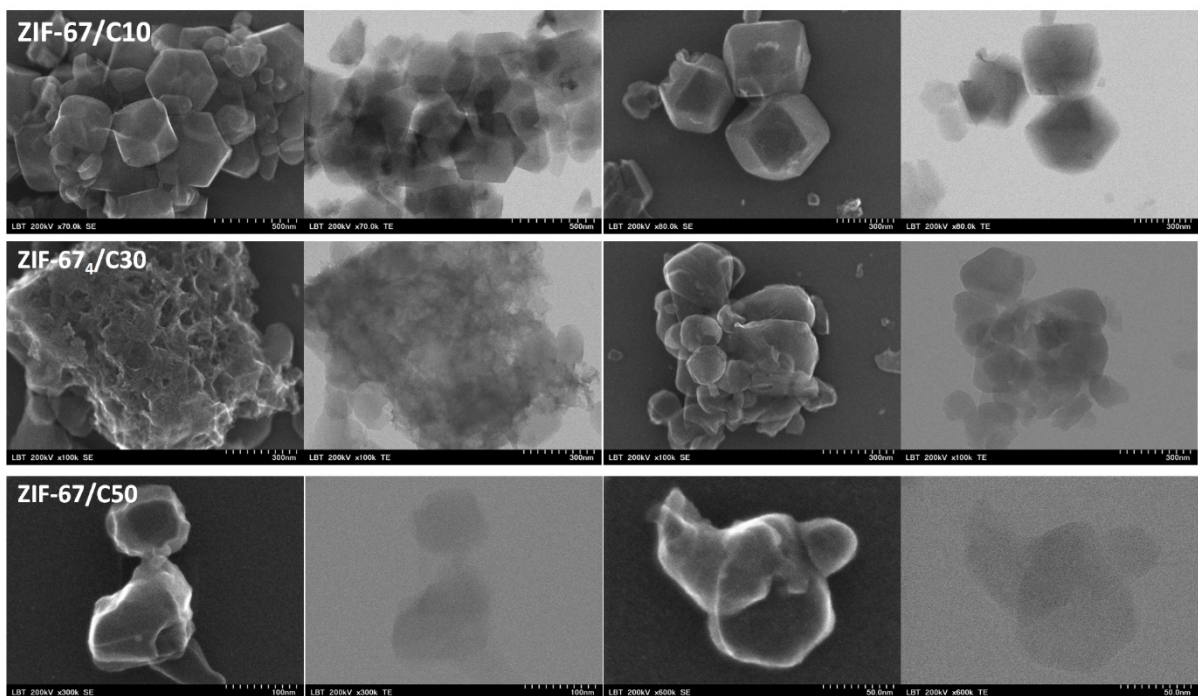

**Figure S5:** S-TEM images of collected for ZIF-67/C nanocomposites.

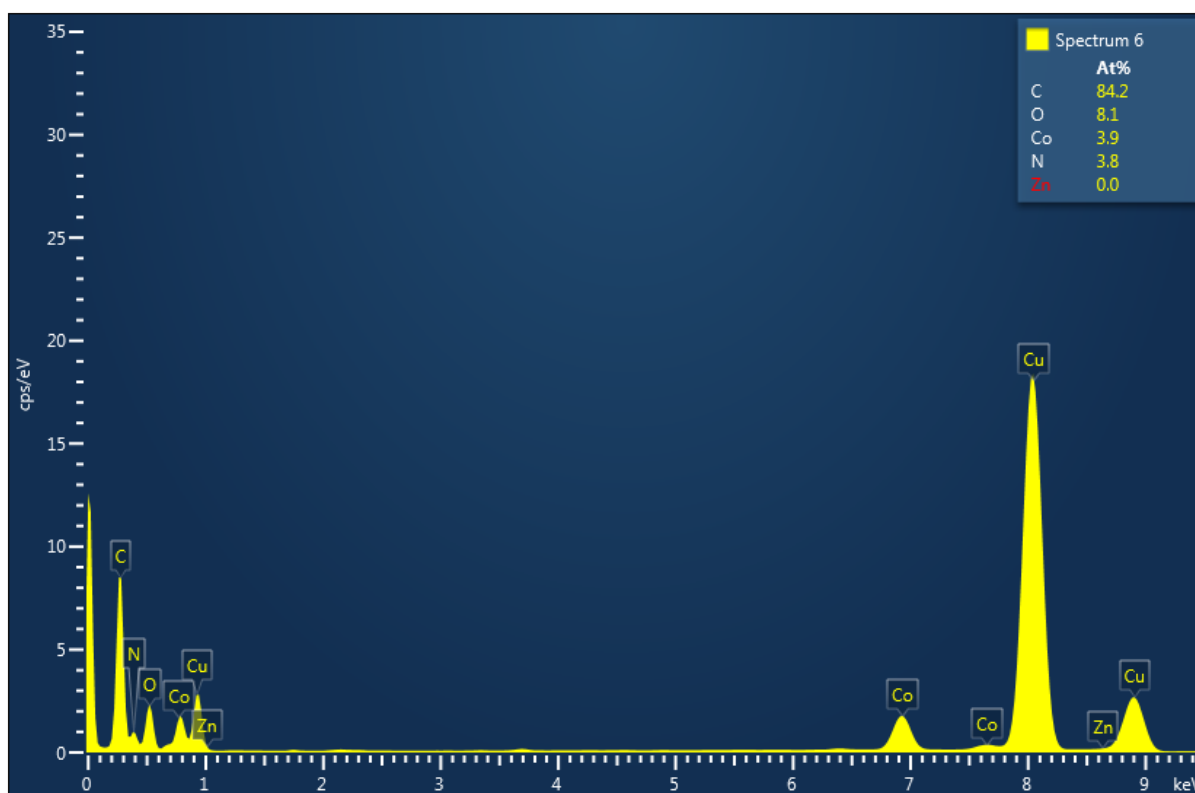

**Figure S6:** EDS spectra of the ZIF-67/C10 composite.  
\*Cu signals are related to the TEM grid sample holder.

**Table S2.** Cell parameters and crystallite size of  $\text{Co}_3\text{O}_4/\text{C}$  nanocomposites obtained from the Rietveld refinement.

| Samples                                    | $a = b = c$ (Å) | Crystallite size (nm) | Volume (Å <sup>3</sup> ) |
|--------------------------------------------|-----------------|-----------------------|--------------------------|
| $\text{Co}_3\text{O}_4$<br>(ICSD – 150805) | 8.0800          | --                    | 527.51                   |
| $\text{Co}_3\text{O}_4/\text{C10}$         | 8.0807±0.003    | 13.94                 | 527.65                   |
| $\text{Co}_3\text{O}_4/\text{C30}$         | 8.0773±0.003    | 13.20                 | 526.99                   |
| $\text{Co}_3\text{O}_4/\text{C50}$         | 8.0770±0.002    | 15.27                 | 526.93                   |

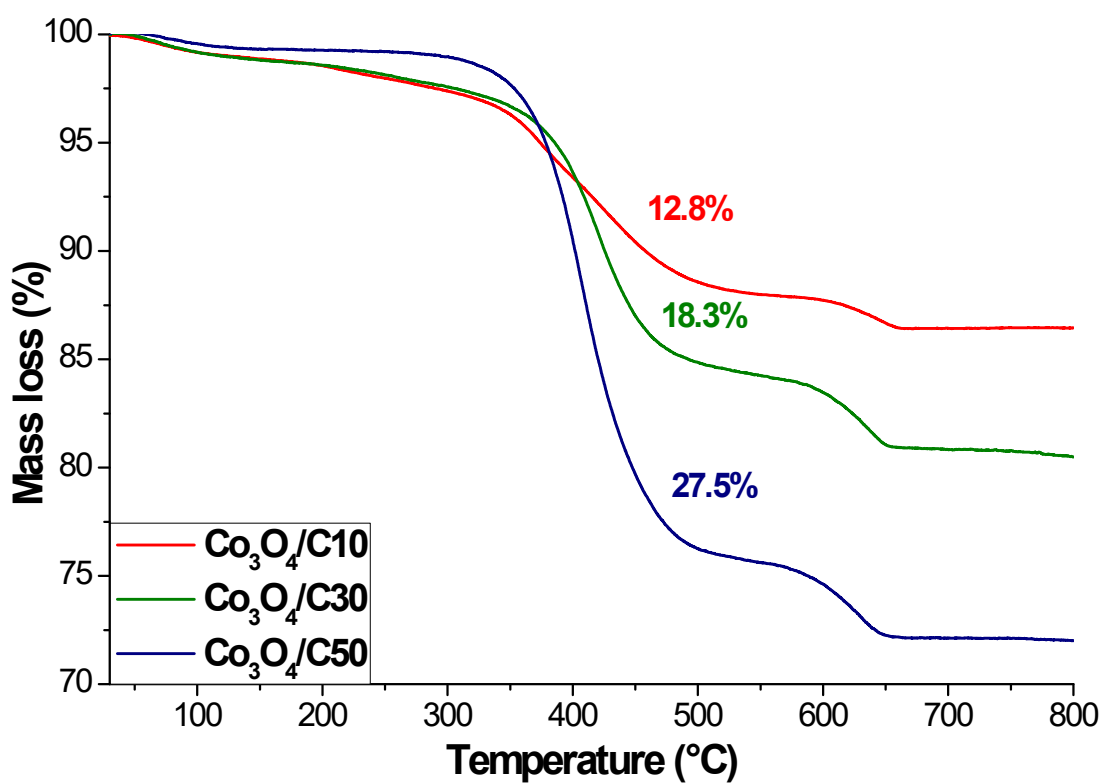

Figure S7: TGA curves of  $\text{Co}_3\text{O}_4/\text{C}$  composites.

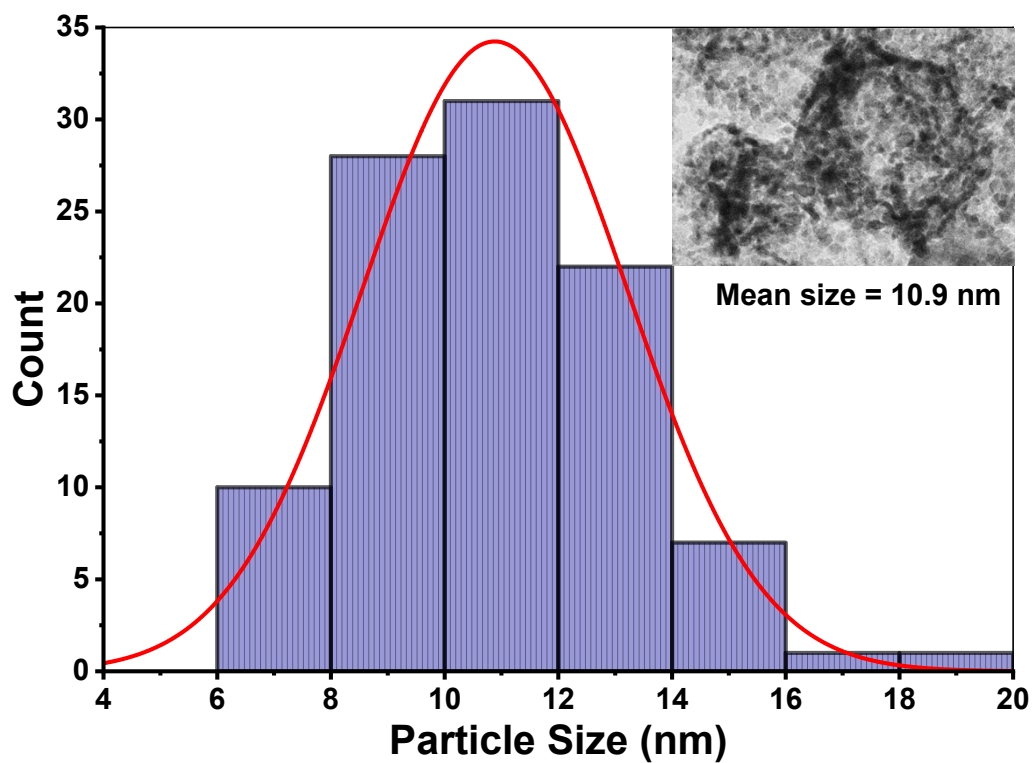

Figure S8: Particle size distribution for the  $\text{Co}_3\text{O}_4/\text{C10}$  nanocomposite, calculated from TEM image.



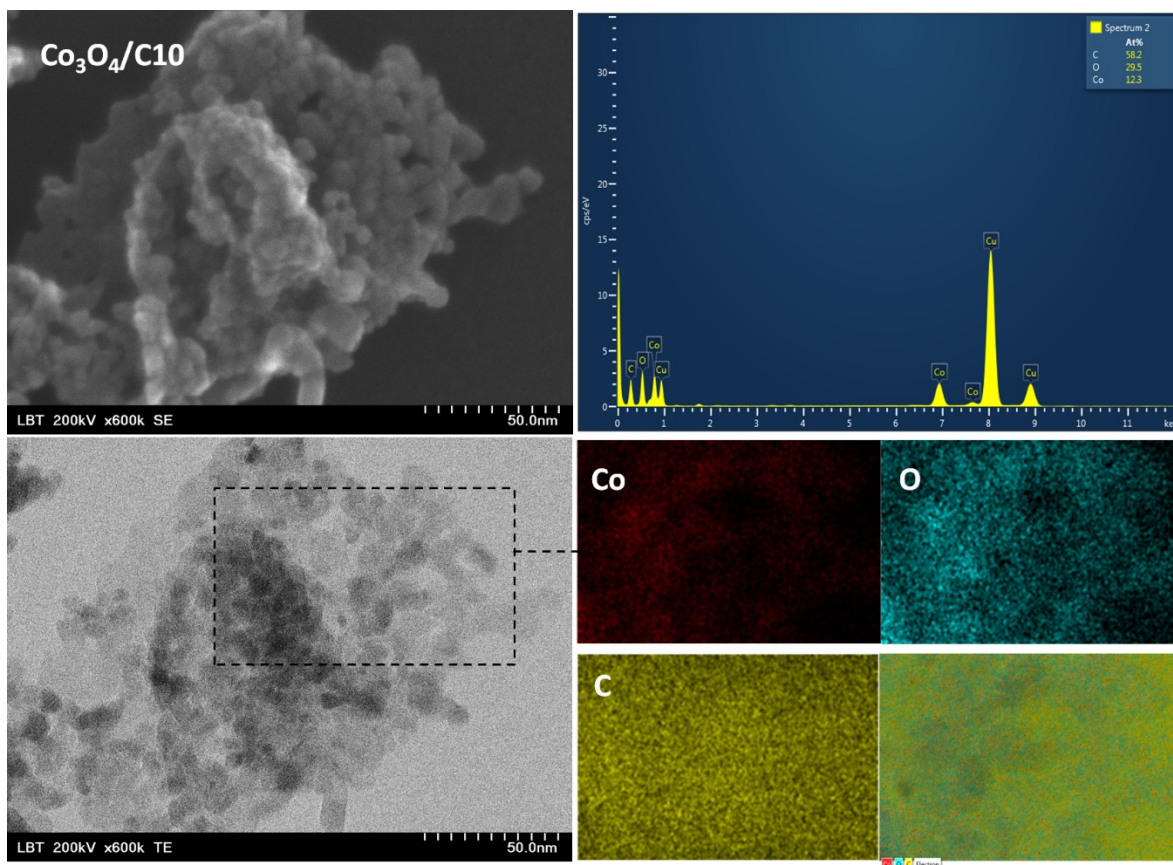

**Figure S9:** S-TEM images and elementary EDX mapping collected for  $\text{Co}_3\text{O}_4/\text{C10}$  nanocomposite.

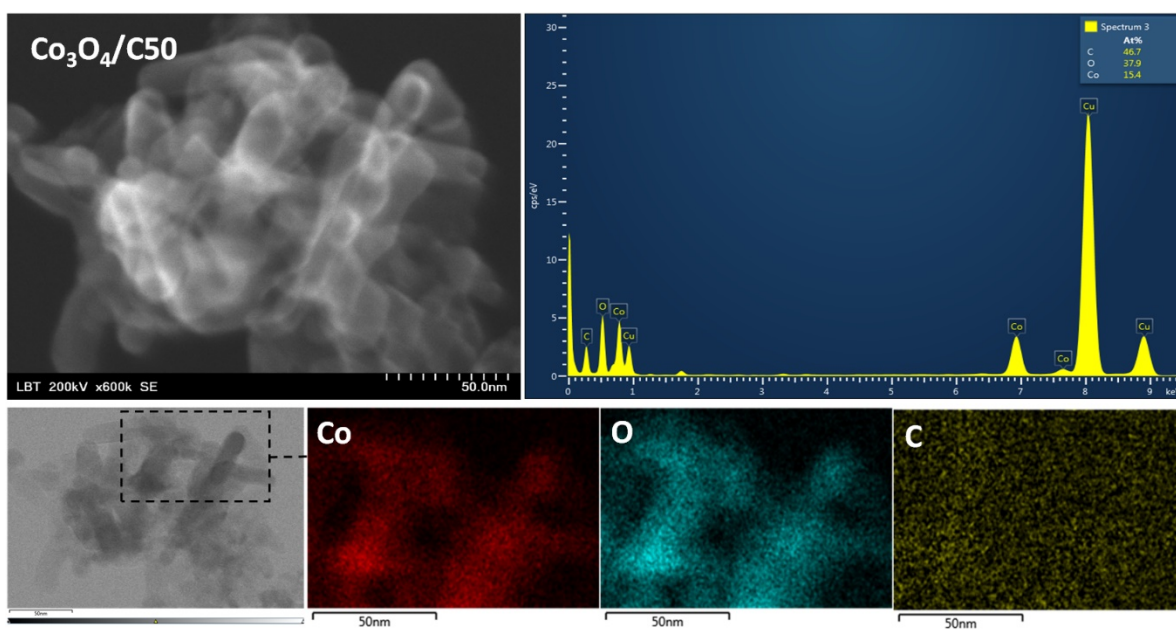

**Figure S10:** S-TEM images and elementary EDX mapping collected for  $\text{Co}_3\text{O}_4/\text{C50}$  nanocomposite.



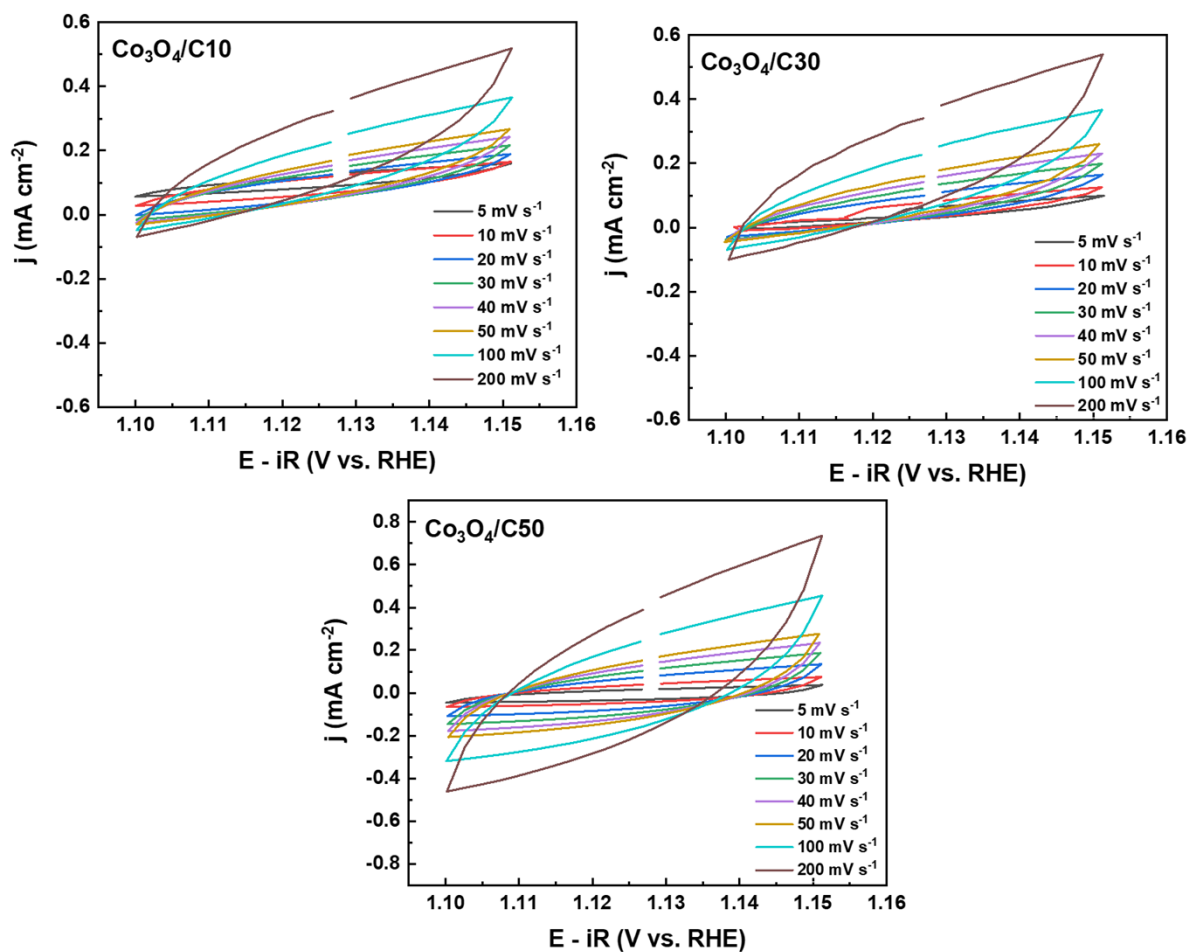

Figure S11: CV curves of  $\text{Co}_3\text{O}_4/\text{C}$  composites.

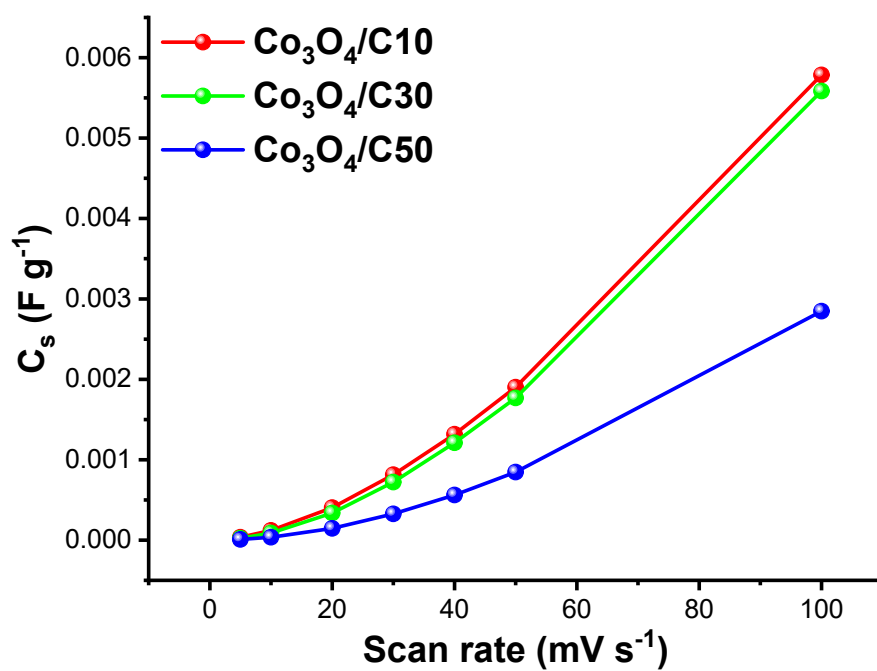

Figure S12: Specific capacitances from CV data.

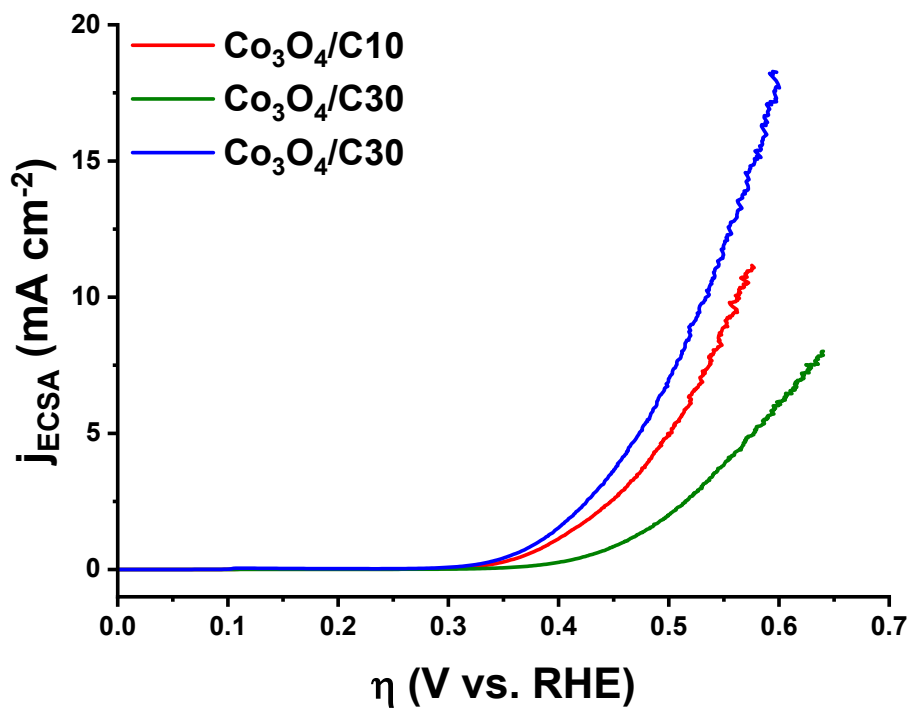

Figure S13: ECSA normalized LSV data.

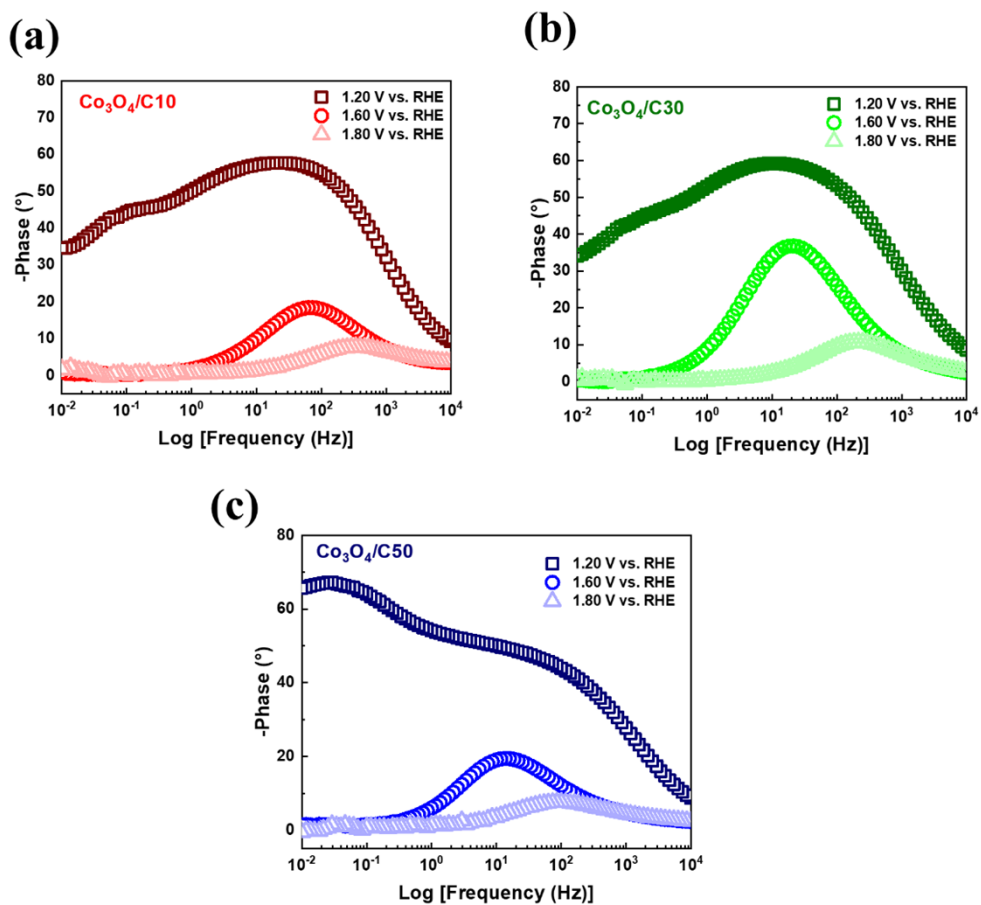

Figure S14: Bode plots obtained from EIS data for  $\text{Co}_3\text{O}_4/\text{C}$  composites.

**Table S3:** XPS deconvolution parameters for sample ZIF-67/C10.

| Peak assignment                    | Position (eV) | FWHM | Area/(RSF x T x MFP)<br>(eV s <sup>-1</sup> ) |
|------------------------------------|---------------|------|-----------------------------------------------|
| Co <sup>3+</sup> 2p <sub>3/2</sub> | 780.48        | 4.46 | 255.702                                       |
| Co <sup>3+</sup> 2p <sub>1/2</sub> | 795.78        | 4.91 | 248.001                                       |
| Co <sup>2+</sup> 2p <sub>3/2</sub> | 778.28        | 1.75 | 127.757                                       |
| Co <sup>2+</sup> 2p <sub>1/2</sub> | 793.58        | 1.93 | 123.907                                       |
| sat2                               | 787.11        | 2.99 | 12.1062                                       |
| sat4                               | 804.1         | 4.5  | 23.4103                                       |
| sat1                               | 783.03        | 5.52 | 106.429                                       |
| Co Auger                           | 778.99        | 2.19 | 98.9171                                       |
| sat 3                              | 800.05        | 4.74 | 20.6222                                       |
| Co Auger                           | 776.22        | 1.5  | 10.2545                                       |

**Table S4:** XPS deconvolution parameters for sample Co<sub>3</sub>O<sub>4</sub>/C10.

| Peak assignment                    | Position (eV) | FWHM | Area/(RSF x T x MFP)<br>(eV s <sup>-1</sup> ) |
|------------------------------------|---------------|------|-----------------------------------------------|
| Co <sup>3+</sup> 2p <sub>3/2</sub> | 780.25        | 3.8  | 919.04                                        |
| Co <sup>3+</sup> 2p <sub>1/2</sub> | 795.55        | 4.18 | 877.003                                       |
| Co <sup>2+</sup> 2p <sub>3/2</sub> | 778.44        | 2.51 | 460.109                                       |
| Co <sup>2+</sup> 2p <sub>1/2</sub> | 793.74        | 2.76 | 439.075                                       |
| sat2                               | 788.44        | 4.32 | 153.245                                       |
| sat4                               | 802           | 5.36 | 184.78                                        |
| sat1                               | 784.62        | 4.78 | 409.185                                       |
| Co Auger                           | 778.7         | 2.86 | 155.401                                       |
| sat 3                              | 800.97        | 2.93 | 26.2153                                       |
| Co Auger                           | 775.94        | 3.56 | 103.6                                         |

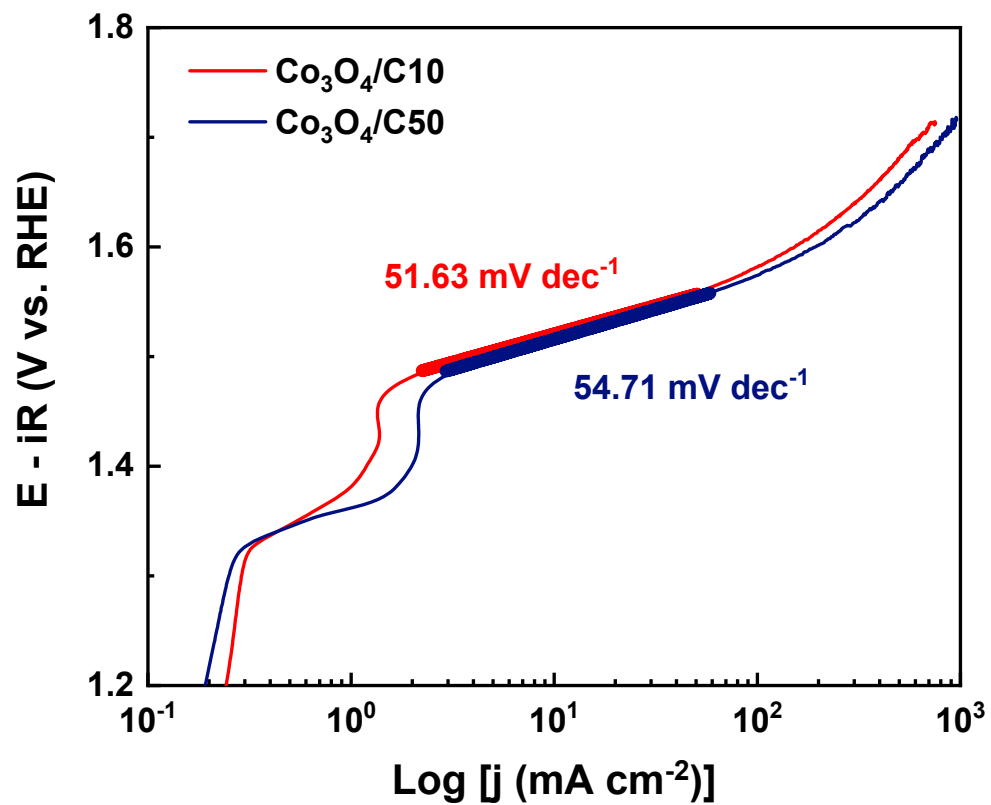

**Figure S15:** Tafel slopes for  $\text{Co}_3\text{O}_4/\text{C10}$  and  $\text{Co}_3\text{O}_4/\text{C50}$  samples after chronopotentiometry experiments.

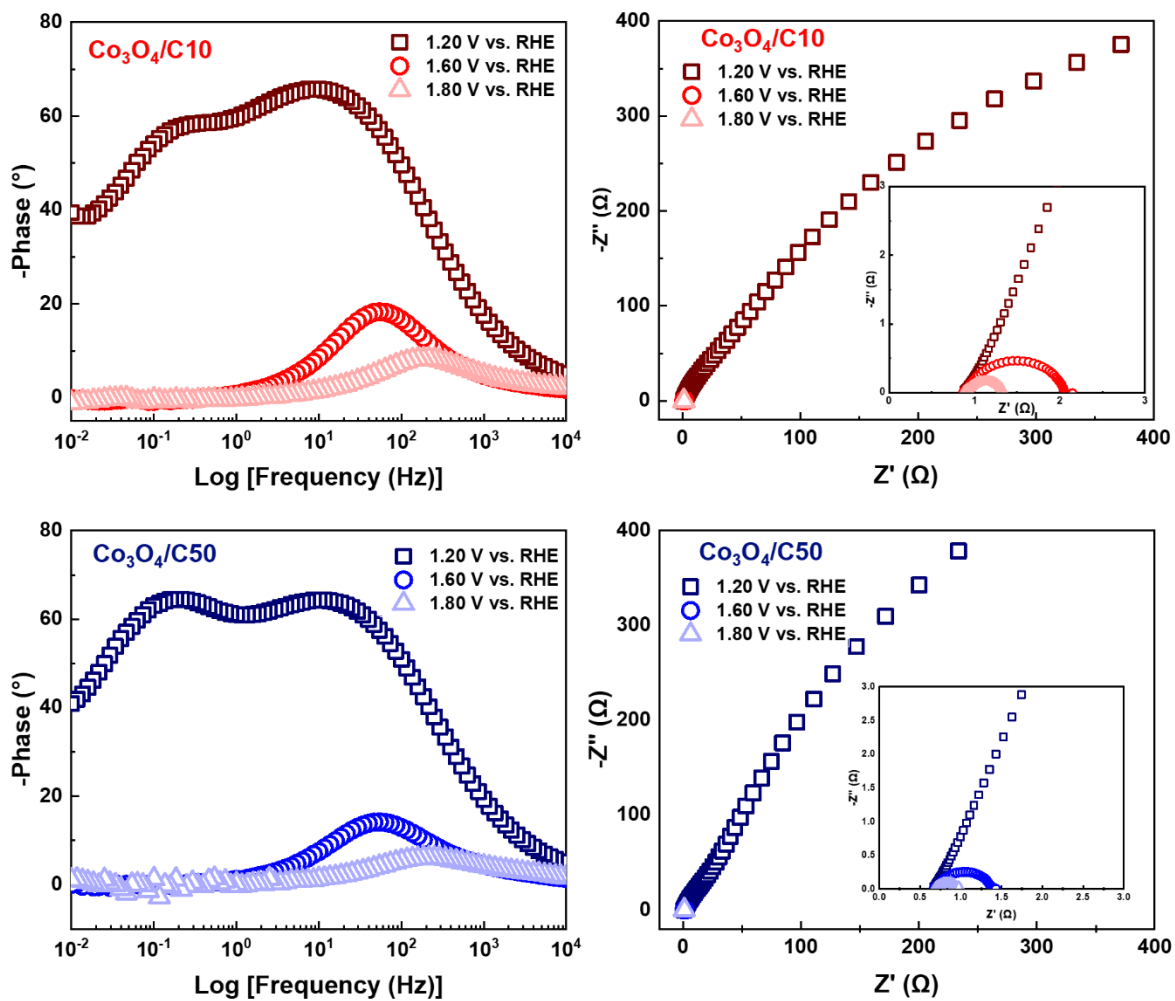

**Figure S16:** ESI data of the  $\text{Co}_3\text{O}_4/\text{C10}$  and  $\text{Co}_3\text{O}_4/\text{C50}$  samples after chronopotentiometry experiments.

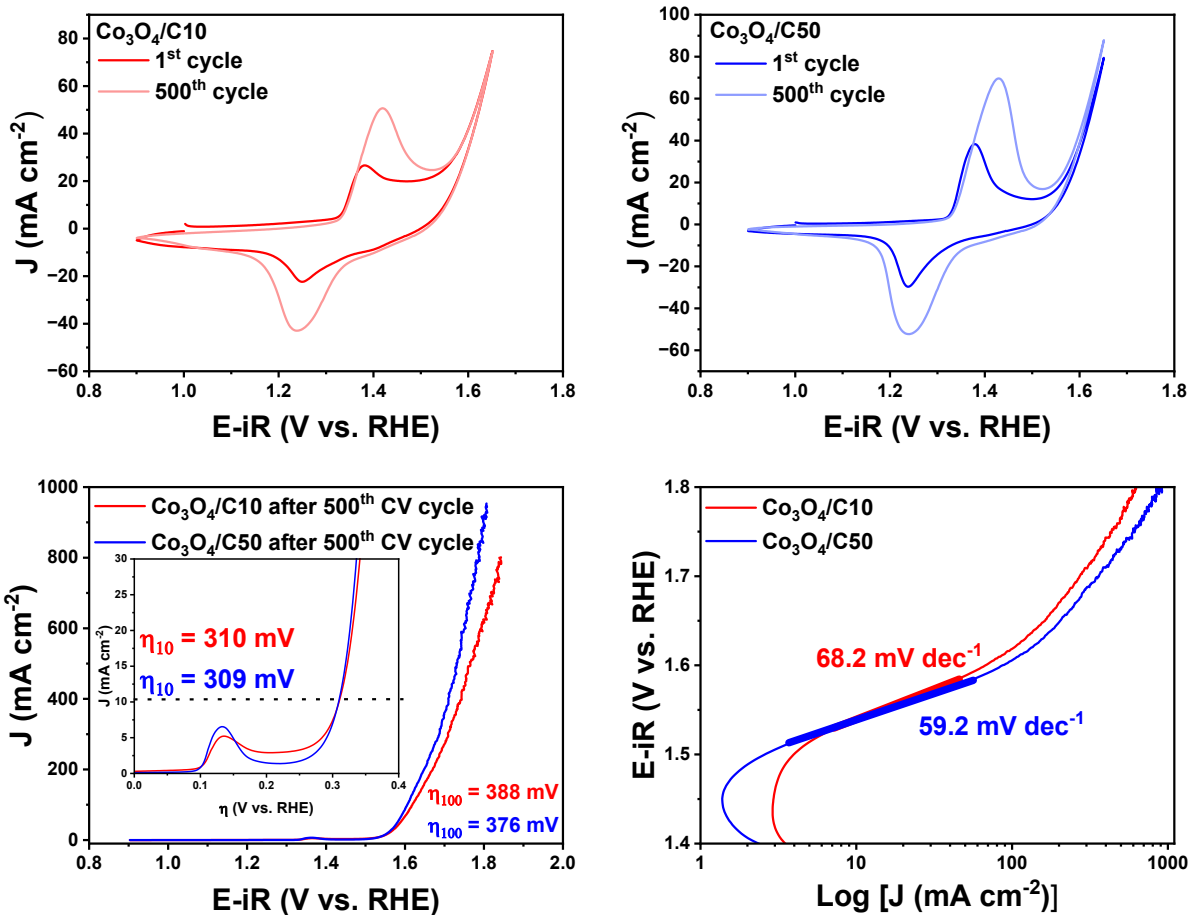

**Figure S17:** The first and 500<sup>th</sup> CV cycle, LSV and Tafel slope data after the 500<sup>th</sup> CV cycle.
